# Supplementary material
Source: bioRxiv or medRxiv preprint supplement (https://medrxiv.org/content/medrxiv/early/2022/08/18/2022.08.17.22278896/DC1/embed/media-1.pdf)
Supplement: Supplementary file [file media-1.pdf]

## SUPPLEMENTAL MATERIAL

**eFigure 1. Correlation between potential confounders and patient-reported outcomes.**

Using a data-driven approach for covariate adjustment, we calculated the Pearson correlation coefficients ( $R^2$ , actual value and heatmap intensity shown inside each box) and the p-values (marked as meeting the pre-defined significance threshold) of potential confounding variables in relation to patient-reported outcomes. Covariates were selected for adjustment in downstream analysis if over 70% of participants had the pertinent information (frequency > 70%), the average correlation coefficient across all patient-reported outcomes was over 0.1 ( $R^2 > 0.1$ ), and the p-values met the nominal significance threshold ( $p < .05$ ).

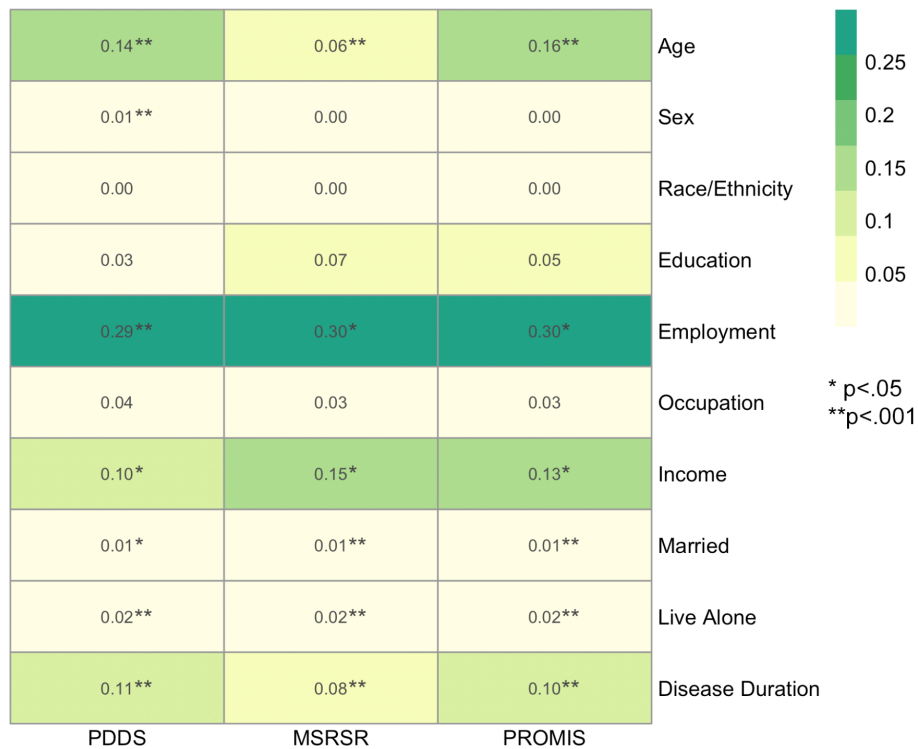

**eTable 1. Participant characteristics of cross-sectional cohorts by recruitment site.**

|                                                      | MS                    | Control     | MS                    | Control     | MS                    | Contro<br>1 | MS                    | Control    | MS                    | Contro<br>1 | MS                    | Control     | MS                    | Control     | MS                    | Control    |
|------------------------------------------------------|-----------------------|-------------|-----------------------|-------------|-----------------------|-------------|-----------------------|------------|-----------------------|-------------|-----------------------|-------------|-----------------------|-------------|-----------------------|------------|
|                                                      | Cohort 1 <sup>a</sup> |             | Cohort 2 <sup>a</sup> |             | Cohort 3 <sup>a</sup> |             | Cohort 4 <sup>a</sup> |            | Cohort 5 <sup>a</sup> |             | Cohort 6 <sup>a</sup> |             | Cohort 7 <sup>a</sup> |             | Cohort 8 <sup>a</sup> |            |
| N                                                    | 282                   | 60          | 60                    | 165         | 67                    | 2           | 129                   | 222        | 114                   | 34          | 127                   | 12          | 290                   | 23          | 61                    | 732        |
| Age, Mean (SD)                                       | 50.8 (12.9)           | 53.1 (13.7) | 49.3 (11.5)           | 53.6 (17.2) | 46.7 (11.0)           | 26.5 (38.9) | 49.7 (10.9)           | 41.6 (9.1) | 48.5 (13.5)           | 52.7 (17.1) | 55.4 (11.8)           | 52.5 (20.1) | 51.6 (12.0)           | 55.5 (15.1) | 48.1 (7.4)            | 41.6 (8.3) |
| Sex, N (%)                                           |                       |             |                       |             |                       |             |                       |            |                       |             |                       |             |                       |             |                       |            |
| Female                                               | 229 (81.2)            | 31 (51.7)   | 52 (86.7)             | 115 (69.7)  | 51 (76.1)             | 0 (0.0)     | 104 (80.6)            | 183 (82.4) | 92 (80.7)             | 19 (55.9)   | 101 (79.5)            | 7 (58.3)    | 242 (83.4)            | 16 (69.6)   | 54 (88.5)             | 589 (80.5) |
| Male                                                 | 53 (18.8)             | 28 (46.7)   | 7 (11.7)              | 48 (29.1)   | 16 (23.9)             | 2 (100.0)   | 25 (19.4)             | 39 (17.6)  | 22 (19.3)             | 15 (44.1)   | 25 (19.7)             | 5 (41.7)    | 48 (16.6)             | 7 (30.4)    | 7 (11.5)              | 142 (19.4) |
| Other                                                | 0 (0.0)               | 1 (1.7)     | 1 (1.7)               | 2 (1.2)     | 0 (0.0)               | 0 (0.0)     | 0 (0.0)               | 0 (0.0)    | 0 (0.0)               | 0 (0.0)     | 1 (0.8)               | 0 (0.0)     | 0 (0.0)               | 0 (0.0)     | 0 (0.0)               | 1 (0.1)    |
| Race, N (%)                                          |                       |             |                       |             |                       |             |                       |            |                       |             |                       |             |                       |             |                       |            |
| African or African American                          | 8 (2.8)               | 0 (0.0)     | 1 (1.7)               | 1 (0.6)     | 7 (10.4)              | 0 (0.0)     | 4 (3.1)               | 2 (0.9)    | 2 (1.7)               | 1 (3.0)     | 6 (4.7)               | 0 (0.0)     | 17 (6.0)              | 0 (0.0)     | 1 (1.6)               | 8 (1.1)    |
| American Indian or Alaskan Native or Native Hawaiian | 0 (0.0)               | 0 (0.0)     | 0 (0.0)               | 1 (0.6)     | 1 (1.5)               | 0 (0.0)     | 0 (0.0)               | 3 (1.4)    | 7 (6.0)               | 0 (0.0)     | 0 (0.0)               | 0 (0.0)     | 2 (0.7)               | 0 (0.0)     | 0 (0.0)               | 2 (0.3)    |
| Asian                                                | 0 (0.0)               | 0 (0.0)     | 2 (3.3)               | 2 (1.2)     | 1 (1.5)               | 0 (0.0)     | 1 (0.8)               | 0 (0.0)    | 0 (0.0)               | 2 (6.1)     | 2 (1.6)               | 0 (0.0)     | 1 (0.4)               | 0 (0.0)     | 1 (1.6)               | 4 (0.5)    |
| White                                                | 274 (97.2)            | 60 (100.0)  | 55 (91.7)             | 160 (97.0)  | 50 (74.6)             | 2 (100.0)   | 121 (93.8)            | 213 (95.9) | 104 (89.7)            | 30 (90.9)   | 119 (93.7)            | 12 (100.0)  | 261 (92.2)            | 23 (100.0)  | 59 (96.7)             | 708 (96.7) |
| Multi-racial                                         | 0 (0.0)               | 0 (0.0)     | 1 (1.7)               | 1 (0.6)     | 5 (7.5)               | 0 (0.0)     | 0 (0.0)               | 3 (1.4)    | 3 (2.6)               | 0 (0.0)     | 0 (0.0)               | 0 (0.0)     | 0 (0.0)               | 0 (0.0)     | 0 (0.0)               | 7 (1.0)    |
| Other                                                | 0 (0.0)               | 0 (0.0)     | 1 (1.7)               | 0 (0.0)     | 0 (0.0)               | 0 (0.0)     | 2 (1.6)               | 0 (0.0)    | 0 (0.0)               | 0 (0.0)     | 0 (0.0)               | 0 (0.0)     | 2 (0.7)               | 0 (0.0)     | 0 (0.0)               | 1 (0.1)    |
| Not Sure                                             | 0 (0.0)               | 0 (0.0)     | 0 (0.0)               | 0 (0.0)     | 3 (4.5)               | 0 (0.0)     | 1 (0.8)               | 1 (0.5)    | 0 (0.0)               | 0 (0.0)     | 0 (0.0)               | 0 (0.0)     | 0 (0.0)               | 0 (0.0)     | 0 (0.0)               | 2 (0.3)    |
| Ethnicity, N (%)                                     |                       |             |                       |             |                       |             |                       |            |                       |             |                       |             |                       |             |                       |            |
| Hispanic or Latino                                   | 0 (0.0)               | 0 (0.0)     | 5 (8.3)               | 2 (1.2)     | 6 (9.0)               | 0 (0.0)     | 7 (5.4)               | 6 (2.7)    | 8 (6.9)               | 1 (3.1)     | 2 (1.6)               | 0 (0.0)     | 10 (3.5)              | 0 (0.0)     | 0 (0.0)               | 22 (3.0)   |

|                                                |                |               |              |               |              |              |               |               |               |              |               |               |               |               |               |               |
|------------------------------------------------|----------------|---------------|--------------|---------------|--------------|--------------|---------------|---------------|---------------|--------------|---------------|---------------|---------------|---------------|---------------|---------------|
| Non-Hispanic                                   | 282<br>(100.0) | 60<br>(100.0) | 54<br>(90.0) | 163<br>(98.8) | 55<br>(82.1) | 0 (0.0)      | 122<br>(94.6) | 213<br>(95.9) | 103<br>(88.8) | 30<br>(93.8) | 122<br>(96.1) | 12<br>(100.0) | 269<br>(95.1) | 23<br>(100.0) | 61<br>(100.0) | 700<br>(95.8) |
| Not Sure                                       | 0 (0.0)        | 0 (0.0)       | 1 (1.7)      | 0 (0.0)       | 6 (9.0)      | 2<br>(100.0) | 0 (0.0)       | 3 (1.4)       | 5 (4.3)       | 1 (3.1)      | 3 (2.4)       | 0 (0.0)       | 4 (1.4)       | 0 (0.0)       | 0 (0.0)       | 9 (1.2)       |
| Education, N (%)                               |                |               |              |               |              |              |               |               |               |              |               |               |               |               |               |               |
| High school graduate                           | 28<br>(10.0)   | 12<br>(20.0)  | 4 (6.8)      | 7 (4.2)       | 1 (1.6)      | 0 (0.0)      | 6 (4.7)       | 1 (0.5)       | 7 (6.2)       | 0 (0.0)      | 7 (5.5)       | 0 (0.0)       | 16<br>(5.5)   | 4<br>(17.4)   | 1 (1.6)       | 11<br>(1.5)   |
| Some college                                   | 47<br>(16.8)   | 9<br>(15.0)   | 4 (6.8)      | 16<br>(9.7)   | 4 (6.3)      | 0 (0.0)      | 18<br>(14.0)  | 17<br>(7.7)   | 24<br>(21.2)  | 3 (8.8)      | 21<br>(16.5)  | 1 (8.3)       | 31<br>(10.7)  | 8<br>(34.8)   | 5 (8.2)       | 52<br>(7.1)   |
| Associate degree                               | 43<br>(15.4)   | 6<br>(10.0)   | 6<br>(10.2)  | 10<br>(6.1)   | 3 (4.8)      | 0 (0.0)      | 14<br>(10.9)  | 14<br>(6.3)   | 8 (7.1)       | 4<br>(11.8)  | 20<br>(15.7)  | 0 (0.0)       | 13<br>(4.5)   | 2 (8.7)       | 4 (6.6)       | 34<br>(4.7)   |
| Bachelor's degree                              | 81<br>(28.9)   | 16<br>(26.7)  | 18<br>(30.5) | 61<br>(37.0)  | 28<br>(44.4) | 1<br>(50.0)  | 36<br>(27.9)  | 76<br>(34.2)  | 26<br>(23.0)  | 8<br>(23.5)  | 33<br>(26.0)  | 6<br>(50.0)   | 114<br>(39.3) | 3<br>(13.0)   | 27<br>(44.3)  | 270<br>(36.9) |
| Graduate degree                                | 81<br>(28.9)   | 17<br>(28.3)  | 27<br>(45.8) | 70<br>(42.4)  | 27<br>(42.9) | 1<br>(50.0)  | 54<br>(41.9)  | 114<br>(51.4) | 48<br>(42.5)  | 19<br>(55.9) | 44<br>(34.6)  | 5<br>(41.7)   | 114<br>(39.3) | 6<br>(26.1)   | 23<br>(37.7)  | 363<br>(49.7) |
| Employment, N (%)                              |                |               |              |               |              |              |               |               |               |              |               |               |               |               |               |               |
| Employed for wages                             | 121<br>(42.9)  | 30<br>(50.0)  | 33<br>(55.0) | 74<br>(44.8)  | 36<br>(53.7) | 1<br>(50.0)  | 66<br>(51.2)  | 169<br>(76.1) | 60<br>(52.6)  | 18<br>(52.9) | 47<br>(37.0)  | 6<br>(50.0)   | 140<br>(48.3) | 4<br>(17.4)   | 41<br>(67.2)  | 574<br>(78.4) |
| Homemaker                                      | 15 (5.3)       | 0 (0.0)       | 1 (1.7)      | 3 (1.8)       | 4 (6.0)      | 0 (0.0)      | 5 (3.9)       | 16<br>(7.2)   | 8 (7.0)       | 0 (0.0)      | 7 (5.5)       | 1 (8.3)       | 21<br>(7.2)   | 0 (0.0)       | 2 (3.3)       | 57<br>(7.8)   |
| Military                                       | 0 (0.0)        | 0 (0.0)       | 0 (0.0)      | 0 (0.0)       | 0 (0.0)      | 0 (0.0)      | 1 (0.8)       | 0 (0.0)       | 0 (0.0)       | 0 (0.0)      | 0 (0.0)       | 0 (0.0)       | 0 (0.0)       | 0 (0.0)       | 1 (1.6)       | 0 (0.0)       |
| Out of work and looking for work               | 4 (1.4)        | 0 (0.0)       | 1 (1.7)      | 4 (2.4)       | 2 (3.0)      | 0 (0.0)      | 2 (1.6)       | 8 (3.6)       | 2 (1.8)       | 1 (2.9)      | 4 (3.1)       | 0 (0.0)       | 1 (0.3)       | 0 (0.0)       | 1 (1.6)       | 14<br>(1.9)   |
| Out of work but not currently looking for work | 7 (2.5)        | 0 (0.0)       | 2 (3.3)      | 4 (2.4)       | 1 (1.5)      | 1<br>(50.0)  | 5 (3.9)       | 2 (0.9)       | 4 (3.5)       | 0 (0.0)      | 6 (4.7)       | 0 (0.0)       | 4 (1.4)       | 0 (0.0)       | 0 (0.0)       | 8 (1.1)       |
| Retired                                        | 46<br>(16.3)   | 16<br>(26.7)  | 6<br>(10.0)  | 55<br>(33.3)  | 8<br>(11.9)  | 0 (0.0)      | 20<br>(15.5)  | 2 (0.9)       | 18<br>(15.8)  | 8<br>(23.5)  | 30<br>(23.6)  | 3<br>(25.0)   | 56<br>(19.3)  | 7<br>(30.4)   | 3 (4.9)       | 7 (1.0)       |
| Self-employed                                  | 11 (3.9)       | 5 (8.3)       | 2 (3.3)      | 10<br>(6.1)   | 3 (4.5)      | 0 (0.0)      | 7 (5.4)       | 16<br>(7.2)   | 7 (6.1)       | 4<br>(11.8)  | 5 (3.9)       | 0 (0.0)       | 25<br>(8.6)   | 1 (4.3)       | 3 (4.9)       | 61<br>(8.3)   |

|                        |            |           |           |           |           |          |           |            |           |           |           |           |            |           |           |            |
|------------------------|------------|-----------|-----------|-----------|-----------|----------|-----------|------------|-----------|-----------|-----------|-----------|------------|-----------|-----------|------------|
| Student                | 5 (1.8)    | 0 (0.0)   | 1 (1.7)   | 8 (4.8)   | 2 (3.0)   | 0 (0.0)  | 1 (0.8)   | 4 (1.8)    | 1 (0.9)   | 0 (0.0)   | 0 (0.0)   | 0 (0.0)   | 2 (0.7)    | 0 (0.0)   | 0 (0.0)   | 6 (0.8)    |
| Unable to work         | 64 (22.7)  | 9 (15.0)  | 14 (23.3) | 5 (3.0)   | 9 (13.4)  | 0 (0.0)  | 18 (14.0) | 5 (2.3)    | 13 (11.4) | 3 (8.8)   | 27 (21.3) | 2 (16.7)  | 37 (12.8)  | 11 (47.8) | 8 (13.1)  | 4 (0.5)    |
| Household Income (%)   |            |           |           |           |           |          |           |            |           |           |           |           |            |           |           |            |
| 0 to \$19,999          | 32 (11.7)  | 8 (13.6)  | 6 (10.7)  | 11 (6.9)  | *         | *        | 6 (4.9)   | 5 (2.4)    | 6 (5.7)   | 3 (8.8)   | 7 (7.1)   | 0 (0.0)   | 12 (4.7)   | 3 (20.0)  | 5 (8.6)   | 7 (1.0)    |
| \$20,000 to \$34,999   | 26 (9.5)   | 3 (5.1)   | 6 (10.7)  | 17 (10.6) | *         | *        | 10 (8.2)  | 8 (3.9)    | 12 (11.3) | 1 (2.9)   | 15 (15.2) | 0 (0.0)   | 13 (5.1)   | 2 (13.3)  | 3 (5.2)   | 25 (3.5)   |
| \$35,000 to \$49,999   | 43 (15.7)  | 6 (10.2)  | 8 (14.3)  | 11 (6.9)  | *         | *        | 8 (6.6)   | 10 (4.8)   | 8 (7.5)   | 2 (5.9)   | 9 (9.1)   | 0 (0.0)   | 16 (6.2)   | 1 (6.7)   | 5 (8.6)   | 45 (6.4)   |
| \$50,000 to \$64,999   | 28 (10.2)  | 6 (10.2)  | 5 (8.9)   | 24 (15.0) | *         | *        | 9 (7.4)   | 20 (9.7)   | 12 (11.3) | 2 (5.9)   | 15 (15.2) | 1 (12.5)  | 21 (8.2)   | 0 (0.0)   | 2 (3.4)   | 53 (7.5)   |
| \$65,000 to \$79,999   | 26 (9.5)   | 8 (13.6)  | 4 (7.1)   | 16 (10.0) | *         | *        | 14 (11.5) | 21 (10.1)  | 10 (9.4)  | 3 (8.8)   | 8 (8.1)   | 0 (0.0)   | 12 (4.7)   | 0 (0.0)   | 5 (8.6)   | 72 (10.2)  |
| \$80,000 to \$94,999   | 15 (5.5)   | 3 (5.1)   | 2 (3.6)   | 19 (11.9) | *         | *        | 11 (9.0)  | 14 (6.8)   | 6 (5.7)   | 6 (17.6)  | 11 (11.1) | 1 (12.5)  | 26 (10.1)  | 2 (13.3)  | 5 (8.6)   | 49 (6.9)   |
| \$95,000 to \$109,999  | 29 (10.6)  | 6 (10.2)  | 2 (3.6)   | 13 (8.1)  | *         | *        | 14 (11.5) | 22 (10.6)  | 4 (3.8)   | 3 (8.8)   | 11 (11.1) | 2 (25.0)  | 15 (5.8)   | 0 (0.0)   | 5 (8.6)   | 81 (11.5)  |
| \$110,000 to \$124,999 | 26 (9.5)   | 6 (10.2)  | 4 (7.1)   | 15 (9.4)  | *         | *        | 7 (5.7)   | 21 (10.1)  | 12 (11.3) | 3 (8.8)   | 3 (3.0)   | 1 (12.5)  | 26 (10.1)  | 1 (6.7)   | 7 (12.1)  | 65 (9.2)   |
| \$125,000 or higher    | 49 (17.9)  | 13 (22.0) | 19 (33.9) | 34 (21.2) | *         | *        | 43 (35.2) | 86 (41.5)  | 35 (33.0) | 10 (29.4) | 20 (20.2) | 3 (37.5)  | 116 (45.1) | 6 (40.0)  | 21 (36.2) | 309 (43.8) |
| Married, N (%)         | 185 (66.1) | 44 (73.3) | 37 (62.7) | 86 (52.1) | 45 (67.2) | 1 (50.0) | 95 (73.6) | 151 (68.0) | 84 (73.7) | 14 (42.4) | 82 (64.6) | 11 (91.7) | 214 (73.8) | 14 (60.9) | 44 (74.6) | 520 (71.2) |
| Live Alone, N (%)      | 52 (18.5)  | 11 (19.0) | 13 (22.0) | 43 (26.1) | *         | *        | 16 (12.6) | 27 (12.3)  | 14 (12.3) | 8 (24.2)  | 20 (15.9) | 1 (8.3)   | 32 (11.0)  | 6 (26.1)  | 9 (15.3)  | 90 (12.3)  |
| Occupation, N (%)      |            |           |           |           |           |          |           |            |           |           |           |           |            |           |           |            |
| Business owner         | 9 (6.8)    | 0 (0.0)   | 2 (5.7)   | 3 (3.6)   | *         | *        | 5 (6.8)   | 5 (2.7)    | 2 (3.0)   | 1 (4.5)   | 3 (5.8)   | 0 (0.0)   | 11 (6.7)   | 0 (0.0)   | 3 (6.8)   | 14 (2.2)   |
| Executive, manager     | 19 (14.4)  | 5 (14.3)  | 2 (5.7)   | 5 (6.0)   | *         | *        | 12 (16.4) | 31 (16.8)  | 13 (19.4) | 8 (36.4)  | 5 (9.6)   | 1 (16.7)  | 38 (23.0)  | 2 (40.0)  | 11 (25.0) | 105 (16.5) |

|                                                           |             |             |             |            |             |            |             |            |             |             |             |            |             |             |            |            |
|-----------------------------------------------------------|-------------|-------------|-------------|------------|-------------|------------|-------------|------------|-------------|-------------|-------------|------------|-------------|-------------|------------|------------|
| Laborer, unskilled worker                                 | 4 (3.0)     | 1 (2.9)     | 0 (0.0)     | 0 (0.0)    | *           | *          | 0 (0.0)     | 0 (0.0)    | 0 (0.0)     | 0 (0.0)     | 2 (3.8)     | 0 (0.0)    | 0 (0.0)     | 0 (0.0)     | 1 (2.3)    | 3 (0.5)    |
| Machine operator, inspector, bus/cab driver               | 0 (0.0)     | 0 (0.0)     | 0 (0.0)     | 0 (0.0)    | *           | *          | 0 (0.0)     | 0 (0.0)    | 1 (1.5)     | 0 (0.0)     | 0 (0.0)     | 0 (0.0)    | 0 (0.0)     | 0 (0.0)     | 0 (0.0)    | 0 (0.0)    |
| Mechanic, electrician, skilled worker                     | 0 (0.0)     | 0 (0.0)     | 0 (0.0)     | 1 (1.2)    | *           | *          | 0 (0.0)     | 3 (1.6)    | 1 (1.5)     | 0 (0.0)     | 1 (1.9)     | 0 (0.0)    | 4 (2.4)     | 0 (0.0)     | 0 (0.0)    | 10 (1.6)   |
| Other                                                     | 19 (14.4)   | 3 (8.6)     | 5 (14.3)    | 17 (20.2)  | *           | *          | 11 (15.1)   | 27 (14.6)  | 12 (17.9)   | 4 (18.2)    | 6 (11.5)    | 0 (0.0)    | 21 (12.7)   | 0 (0.0)     | 6 (13.6)   | 78 (12.3)  |
| Professional                                              | 66 (50.0)   | 19 (54.3)   | 22 (62.9)   | 46 (54.8)  | *           | *          | 38 (52.1)   | 106 (57.3) | 33 (49.3)   | 8 (36.4)    | 28 (53.8)   | 4 (66.7)   | 73 (44.2)   | 2 (40.0)    | 22 (50.0)  | 360 (56.7) |
| Sales or clerical worker                                  | 14 (10.6)   | 5 (14.3)    | 4 (11.4)    | 10 (11.9)  | *           | *          | 5 (6.8)     | 10 (5.4)   | 5 (7.5)     | 1 (4.5)     | 7 (13.5)    | 1 (16.7)   | 18 (10.9)   | 1 (20.0)    | 1 (2.3)    | 56 (8.8)   |
| Service worker                                            | 1 (0.8)     | 2 (5.7)     | 0 (0.0)     | 2 (2.4)    | *           | *          | 2 (2.7)     | 3 (1.6)    | 0 (0.0)     | 0 (0.0)     | 0 (0.0)     | 0 (0.0)    | 0 (0.0)     | 0 (0.0)     | 0 (0.0)    | 9 (1.4)    |
| Network Size, Mean (SD)                                   | 6.1 (3.6)   | 5.8 (3.7)   | 6.9 (4.14)  | 7.0 (4.5)  | 8.2 (4.6)   | 4.5 (0.7)  | 7.4 (4.3)   | 7.2 (4.0)  | 7.1 (3.9)   | 5.6 (3.5)   | 5.4 (3.4)   | 7.2 (3.2)  | 7.4 (4.8)   | 7.3 (5.1)   | 6.6 (4.3)  | 6.7 (3.7)  |
| PDDS <sup>b</sup> , Mean (SD)                             | 2.2 (2.2)   | N/A         | 2.1 (1.9)   | N/A        | 1.6 (2.0)   | N/A        | 1.8 (2.3)   | N/A        | 1.4 (1.9)   | N/A         | 2.2 (2.4)   | N/A        | 1.6 (2.0)   | N/A         | 1.3 (1.9)  | N/A        |
| MSRS-R <sup>c</sup> , Mean (SD)                           | 8.0 (5.5)   | N/A         | 8.8 (5.5)   | N/A        | *           | N/A        | 7.4 (5.9)   | N/A        | 6.7 (5.6)   | N/A         | 8.7 (5.6)   | N/A        | 7.0 (5.0)   | N/A         | 6.5 (5.8)  | N/A        |
| PROMIS Physical Function T-score <sup>d</sup> , Mean (SD) | 45.3 (10.6) | 51.2 (10.4) | 45.8 (11.5) | 53.5 (8.9) | 48.9 (10.3) | 42.7 (4.5) | 46.1 (11.9) | 59.2 (8.0) | 47.3 (10.3) | 45.5 (10.9) | 43.7 (10.6) | 45.5 (7.8) | 47.7 (10.8) | 42.3 (11.2) | 48.3 (9.2) | 57.5 (7.9) |

- a. Cross-sectional cohorts include Cohort 1 and 2 (University of Pittsburgh), Cohort 3 and 4 (Columbia University), Cohort 5 (Yale University), Cohort 6 (University of Buffalo Medical Center), Cohort 7 (University of Pennsylvania), and Cohort 8 (GEMS cohort)
- b. PDDS: Patient-Determined Disease Steps.

- c. MSRS-R: Multiple Sclerosis Rating Scale-Revised.
- d. PROMIS: Patient-Reported Outcomes Measurement Information System Physical Function.
- e. Abbreviation: \* - Data unavailable, N/A - not applicable.

**eTable 2. Cross-sectional analysis of personal social network features in relation to PROMIS Physical Function during the COVID-19 pandemic in control participants.**

|                                              | N    | Beta <sup>a</sup> | 95% CI (lower) | 95% CI (upper) | p value <sup>b</sup> |
|----------------------------------------------|------|-------------------|----------------|----------------|----------------------|
| <i>Network Structure</i>                     |      |                   |                |                |                      |
| Size                                         | 1047 | 0.172             | 0.048          | 0.295          | .007                 |
| Density                                      | 1005 | -0.693            | -2.689         | 1.304          | .496                 |
| Constraint                                   | 1005 | -0.034            | -0.063         | -0.005         | .020                 |
| Effective Size                               | 1005 | 0.313             | 0.018          | 0.608          | .038                 |
| Maximum Degree                               | 1005 | 0.383             | 0.141          | 0.626          | <b>.002</b>          |
| Mean Degree                                  | 1005 | 0.326             | 0.025          | 0.628          | .034                 |
| <i>Network Composition</i>                   |      |                   |                |                |                      |
| Percent Kin                                  | 1022 | -1.065            | -2.800         | 0.669          | .228                 |
| Standard Deviation of Age                    | 760  | -0.025            | -0.123         | 0.073          | .619                 |
| Diversity of Sex                             | 1022 | 0.596             | -1.021         | 2.212          | .470                 |
| Diversity of Race                            | 1020 | 2.844             | -0.013         | 5.702          | .051                 |
| Percent contacted weekly or less             | 1022 | -1.522            | -3.840         | 0.796          | .198                 |
| Percent known for less than 6 years          | 1022 | 0.713             | -1.581         | 3.007          | .542                 |
| Percent who live over 15 miles away          | 1022 | -0.741            | -2.541         | 1.059          | .419                 |
| Percent who drink                            | 1022 | -1.138            | -2.917         | 0.642          | .210                 |
| Percent who smoke                            | 1022 | -4.846            | -7.919         | -1.774         | <b>.002</b>          |
| Percent non exercisers                       | 1022 | -1.574            | -3.212         | 0.064          | .060                 |
| Percent bad diet                             | 1022 | -2.556            | -4.267         | -0.845         | .003                 |
| Percent who have a negative health influence | 1022 | -5.707            | -7.405         | -4.010         | <b>&lt;.001</b>      |

- a. Adjusted for potential confounders including age, employment, and income. Disease duration was not adjusted for since it does not apply to control participants.
- b. Bolded p values meet the significance threshold of  $p < .002$  ( $\alpha = 0.05$ , corrected for 18 comparisons).



**eTable 3. Longitudinal examination of the association between changes in personal social network features (pandemic values minus pre-pandemic baseline) in relation to patient-reported outcomes in people with multiple sclerosis during the pandemic.**

|                                              | PDDS <sup>a</sup> |                   |                |                |                      | MSRS-R <sup>b</sup> |                   |                |                |                      | PROMIS <sup>c</sup> |                   |                |                |                      |
|----------------------------------------------|-------------------|-------------------|----------------|----------------|----------------------|---------------------|-------------------|----------------|----------------|----------------------|---------------------|-------------------|----------------|----------------|----------------------|
|                                              | N                 | Beta <sup>d</sup> | 95% CI (lower) | 95% CI (upper) | p value <sup>d</sup> | N                   | Beta <sup>d</sup> | 95% CI (lower) | 95% CI (upper) | p value <sup>d</sup> | N                   | Beta <sup>d</sup> | 95% CI (lower) | 95% CI (upper) | p value <sup>d</sup> |
| <i>Network Structure</i>                     |                   |                   |                |                |                      |                     |                   |                |                |                      |                     |                   |                |                |                      |
| Size                                         | 185               | -0.004            | -0.063         | 0.055          | .892                 | 185                 | -0.071            | -0.211         | 0.070          | .324                 | 178                 | 0.040             | -0.253         | 0.334          | .786                 |
| Density                                      | 166               | -0.571            | -1.951         | 0.809          | .415                 | 166                 | -1.715            | -5.074         | 1.645          | .315                 | 162                 | 5.581             | -0.851         | 12.014         | .088                 |
| Constraint                                   | 166               | -0.009            | -0.026         | 0.008          | .300                 | 166                 | -0.012            | -0.053         | 0.029          | .574                 | 162                 | 0.084             | 0.004          | 0.165          | .041                 |
| Effective Size                               | 166               | 0.027             | -0.172         | 0.225          | .791                 | 166                 | 0.020             | -0.464         | 0.504          | .935                 | 162                 | -0.610            | -1.554         | 0.333          | .203                 |
| Maximum Degree                               | 166               | 0.011             | -0.122         | 0.143          | .874                 | 166                 | 0.005             | -0.317         | 0.327          | .975                 | 162                 | -0.248            | -0.88          | 0.385          | .440                 |
| Mean Degree                                  | 166               | 0.012             | -0.156         | 0.179          | .891                 | 166                 | -0.055            | -0.464         | 0.354          | .791                 | 162                 | -0.234            | -1.048         | 0.58           | .571                 |
| <i>Network Composition</i>                   |                   |                   |                |                |                      |                     |                   |                |                |                      |                     |                   |                |                |                      |
| Percent Kin                                  | 171               | -0.952            | -2.225         | 0.320          | .141                 | 171                 | -0.849            | -3.956         | 2.257          | .590                 | 166                 | 7.697             | 1.737          | 13.657         | .012                 |
| Standard Deviation of Age                    | 139               | -0.069            | -0.159         | 0.022          | .129                 | 139                 | -0.137            | -0.399         | 0.125          | .290                 | 134                 | 0.016             | -0.496         | 0.528          | .945                 |
| Diversity of Sex                             | 170               | 0.181             | -0.728         | 1.089          | .695                 | 170                 | -1.540            | -3.700         | 0.621          | .161                 | 165                 | -1.049            | -5.361         | 3.262          | .631                 |
| Diversity of Race                            | 170               | -1.456            | -3.754         | 0.842          | .213                 | 170                 | -3.522            | -9.164         | 2.119          | .219                 | 165                 | 3.909             | -7.267         | 15.085         | .490                 |
| Percent contacted weekly or less             | 171               | 0.183             | -1.103         | 1.469          | .779                 | 171                 | -0.442            | -3.562         | 2.679          | .780                 | 166                 | -2.732            | -8.807         | 3.343          | .375                 |
| Percent known for less than 6 years          | 171               | 1.080             | -0.569         | 2.729          | .198                 | 171                 | 1.071             | -2.949         | 5.091          | .599                 | 166                 | -5.856            | -13.668        | 1.956          | .141                 |
| Percent who live over 15 miles away          | 171               | -0.396            | -1.319         | 0.527          | .398                 | 171                 | -0.901            | -3.141         | 1.339          | .428                 | 166                 | 2.366             | -2.188         | 6.921          | .306                 |
| Percent who drink                            | 143               | -0.56             | -1.938         | 0.818          | .423                 | 143                 | -1.89             | -4.973         | 1.192          | .227                 | 143                 | 2.833             | -3.713         | 9.379          | .393                 |
| Percent who smoke                            | 171               | 0.475             | -0.904         | 1.854          | .497                 | 171                 | -3.319            | -6.626         | -0.012         | .049                 | 166                 | 0.514             | -6.179         | 7.207          | .880                 |
| Percent non exercisers                       | 171               | 0.439             | -0.394         | 1.271          | .299                 | 171                 | 1.025             | -0.995         | 3.045          | .318                 | 166                 | 2.13              | -1.831         | 6.09           | .290                 |
| Percent bad diet                             | 143               | 0.202             | -1.072         | 1.476          | .754                 | 143                 | -0.434            | -3.294         | 2.427          | .764                 | 143                 | 2.418             | -3.626         | 8.461          | .430                 |
| Percent who have a negative health influence | 143               | 0.113             | -0.852         | 1.077          | .817                 | 143                 | 0.253             | -1.912         | 2.418          | .817                 | 143                 | -1.144            | -5.725         | 3.437          | .622                 |

a. PDDS: Patient-Determined Disease Steps.

b. MSRS-R: Multiple Sclerosis Rating Scale-Revised.

- c. PROMIS: Patient-Reported Outcomes Measurement Information System Physical Function.
- d. Adjusted for potential confounders including age, disease duration, employment, income, study cohort, and time lapse between pre-pandemic and pandemic assessment. None of the p-values meet the significance threshold of  $p < .00092$  ( $\alpha = 0.05$ , corrected for 54 comparisons).

**eTable 4. Moderation analysis assessing the influence of multiple sclerosis diagnosis on the direction and strength of the association between personal social network features and PROMIS Physical Function during the COVID-19 pandemic.**

|                                              |      | Association between Network Feature and PROMIS Physical Function |                |                |                      | Moderating Effect of MS Diagnosis on Association between Network Feature and PROMIS Physical Function |                |                |                      |
|----------------------------------------------|------|------------------------------------------------------------------|----------------|----------------|----------------------|-------------------------------------------------------------------------------------------------------|----------------|----------------|----------------------|
|                                              | N    | Beta                                                             | 95% CI (lower) | 95% CI (upper) | p value <sup>a</sup> | Beta                                                                                                  | 95% CI (lower) | 95% CI (upper) | p value <sup>a</sup> |
| <i>Network Structure</i>                     |      |                                                                  |                |                |                      |                                                                                                       |                |                |                      |
| Size                                         | 1985 | 0.194                                                            | -0.112         | 0.5            | .214                 | 0.035                                                                                                 | -0.157         | 0.226          | .723                 |
| Density                                      | 1896 | -1.047                                                           | -6.032         | 3.938          | .680                 | 0.389                                                                                                 | -2.77          | 3.547          | .809                 |
| Constraint                                   | 1896 | -0.067                                                           | -0.138         | 0.004          | .064                 | 0.022                                                                                                 | -0.022         | 0.067          | .325                 |
| Effective Size                               | 1896 | 0.423                                                            | -0.325         | 1.17           | .267                 | -0.018                                                                                                | -0.502         | 0.466          | .943                 |
| Maximum Degree                               | 1896 | 0.784                                                            | 0.179          | 1.389          | .011                 | -0.27                                                                                                 | -0.654         | 0.115          | .169                 |
| Mean Degree                                  | 1896 | 0.709                                                            | -0.036         | 1.454          | .062                 | -0.282                                                                                                | -0.745         | 0.182          | .233                 |
| <i>Network Composition</i>                   |      |                                                                  |                |                |                      |                                                                                                       |                |                |                      |
| Percent Kin                                  | 1927 | -0.234                                                           | -4.554         | 4.085          | .915                 | -0.924                                                                                                | -3.656         | 1.808          | .507                 |
| Standard Deviation of Age                    | 1321 | -0.019                                                           | -0.258         | 0.22           | .876                 | 0.002                                                                                                 | -0.147         | 0.151          | .976                 |
| Diversity of Sex                             | 1921 | 0.915                                                            | -3.117         | 4.947          | .656                 | -0.351                                                                                                | -2.925         | 2.22           | .789                 |
| Diversity of Race                            | 1906 | 8.788                                                            | 1.409          | 16.167         | .019                 | -5.878                                                                                                | -10.889        | -0.868         | <b>.022</b>          |
| Percent contacted weekly or less             | 1927 | -0.547                                                           | -6.354         | 5.259          | .853                 | 0.329                                                                                                 | -3.407         | 4.064          | .863                 |
| Percent known for less than 6 years          | 1927 | -3.821                                                           | -9.437         | 1.796          | .182                 | 2.744                                                                                                 | -0.989         | 6.477          | .150                 |
| Percent who live over 15 miles away          | 1927 | -5.434                                                           | -9.91          | -0.957         | .017                 | 4.662                                                                                                 | 1.811          | 7.512          | <b>.001</b>          |
| Percent who drink                            | 1927 | -5.679                                                           | -10.262        | -1.096         | .015                 | 4.697                                                                                                 | 1.653          | 7.741          | <b>.002</b>          |
| Percent who smoke                            | 1927 | -7.724                                                           | -15.198        | -0.25          | .043                 | 1.136                                                                                                 | -3.451         | 5.723          | .627                 |
| Percent non exercisers                       | 1927 | -3.508                                                           | -7.576         | 0.56           | .091                 | 1.116                                                                                                 | -1.449         | 3.682          | .394                 |
| Percent bad diet                             | 1927 | -1.633                                                           | -5.924         | 2.658          | .456                 | -0.972                                                                                                | -3.766         | 1.821          | .495                 |
| Percent who have a negative health influence | 1927 | -11.028                                                          | -15.237        | -6.819         | <.001                | 4.427                                                                                                 | 1.786          | 7.069          | <b>.001</b>          |

a. Bolded p-values met the significance threshold of  $p < .05$ .
